# Supplementary material for: OCT4 supports extended LIF-independent self-renewal and maintenance of transcriptional and epigenetic networks in embryonic stem cells
Source: PubMed Central journal article supplement (PMC5703885; doi:10.1038/s41598-017-16611-y), 2017-11-27

## **SUPPLEMENTAL INFORMATION**

OCT4 supports extended LIF-independent self-renewal and maintenance of  
transcriptional and epigenetic networks in embryonic stem cells

Runsheng He<sup>1-2</sup>, Besa Xhabija<sup>1-2</sup>, Batool Al-Qanber<sup>1-2</sup>, Benjamin L. Kidder<sup>1-2\*</sup>

<sup>1</sup>Department of Oncology, Wayne State University School of Medicine, Detroit, MI,  
USA

<sup>2</sup>Karmanos Cancer Institute, Wayne State University School of Medicine, Detroit, MI,  
USA

**Supplemental Figure 1. OCT4 overexpression promotes LIF-independent ES cell self-renewal in the absence of GSK3i and with or without FBS**

AP staining of (A) wild-type ES cells and (B-C) LIF-independent iOCT4 ES cells cultured in LIF-independent ES cell media containing FBS, without GSK3i, and with JAKi (bottom) or without JAKi (top) for 12 days. (D) ES cells were scored by AP staining. The percentage of AP positive colonies is represented as mean  $\pm$  SEM. p values were calculated using a t test. (E) Bright-field microscopy (top) and AP staining (bottom) of wild-type ES cells cultured in LIF-independent serum-free ES cell media without GSK3i for 7 days. (F-G) Bright-field microscopy (top) and AP staining (bottom) of iOCT4 ES cells cultured in LIF-independent serum-free ES cell media without GSK3i or doxycycline for 7 days. (H) ES cells were scored by AP staining. The percentage of AP positive colonies is represented as mean  $\pm$  SEM. p values were calculated using a t test. (I-K) AP staining of (I) wild-type and (J-K) LIF-independent iOCT4 ES cells cultured at a moderate cell density (2,500 cells / 6-well) in serum-free and LIF-independent ES cell media with JAKi (bottom) or without JAKi (top).

**Supplemental Figure 2. Expression of OCT4, SOX2, and STAT3 in LIF-independent iOCT4 ES cells**

(A-D) Western blot images with original exposure. (A) Western blots of OCT4 and SOX2, and STAT3 and STAT3-pY705, in control (ZHTc6) ES cells and LIF-independent iOCT4 ES cells cultured in FBS-containing media and GSK3i. HSC70 or ACTIN were used as loading controls. OCT4 levels were normalized to HSC70 using

ImageJ software (<https://imagej.nih.gov/ij/>). **(B)** Western blot of OCT4 and SOX2, and STAT3 and STAT3-pY705, in wild-type (R1) and iOCT4 ES cells cultured in LIF-independent serum-free ES cell media without GSK3i or doxycycline. OCT4 levels were normalized to HSC70 using ImageJ software (<https://imagej.nih.gov/ij/>). **(C)** Western blot of OCT4, and STAT3 and STAT3-pY705, in LIF-independent iOCT4 ES cells cultured without GSK3i or LIF and with doxycycline to repress OCT4 transgene expression over a time-course of 6 days. Note that the levels of OCT4 and STAT3-pY705 protein is significantly decreased after three days of culture in the presence of doxycycline. **(D)** Bright-field microscopy of wild-type ES cells cultured in LIF-independent ES cell media with doxycycline but without GSK3i for 3 and 6 days. **(E)** Western blot of OCT4 in wild-type (R1) ES cells cultured in FBS-containing ES cell media with or without LIF, and with or without GSK3i for 11 days. Note that the level of OCT4 protein is significantly reduced in wild-type ES cells cultured in the absence of LIF.

**Supplemental Movie 1. Video 1 of spontaneously beating cardiomyocyte-like cells.**

Wild-type R1 ES cells were cultured in serum-free media in the absence of LIF for two weeks to induce differentiation.

**Supplemental Movie 2. Video 2 of spontaneously beating cardiomyocyte-like cells.**

LIF-independent iOCT4 ES cells were cultured in serum-free media without LIF in the presence of doxycycline for two weeks to induce differentiation.

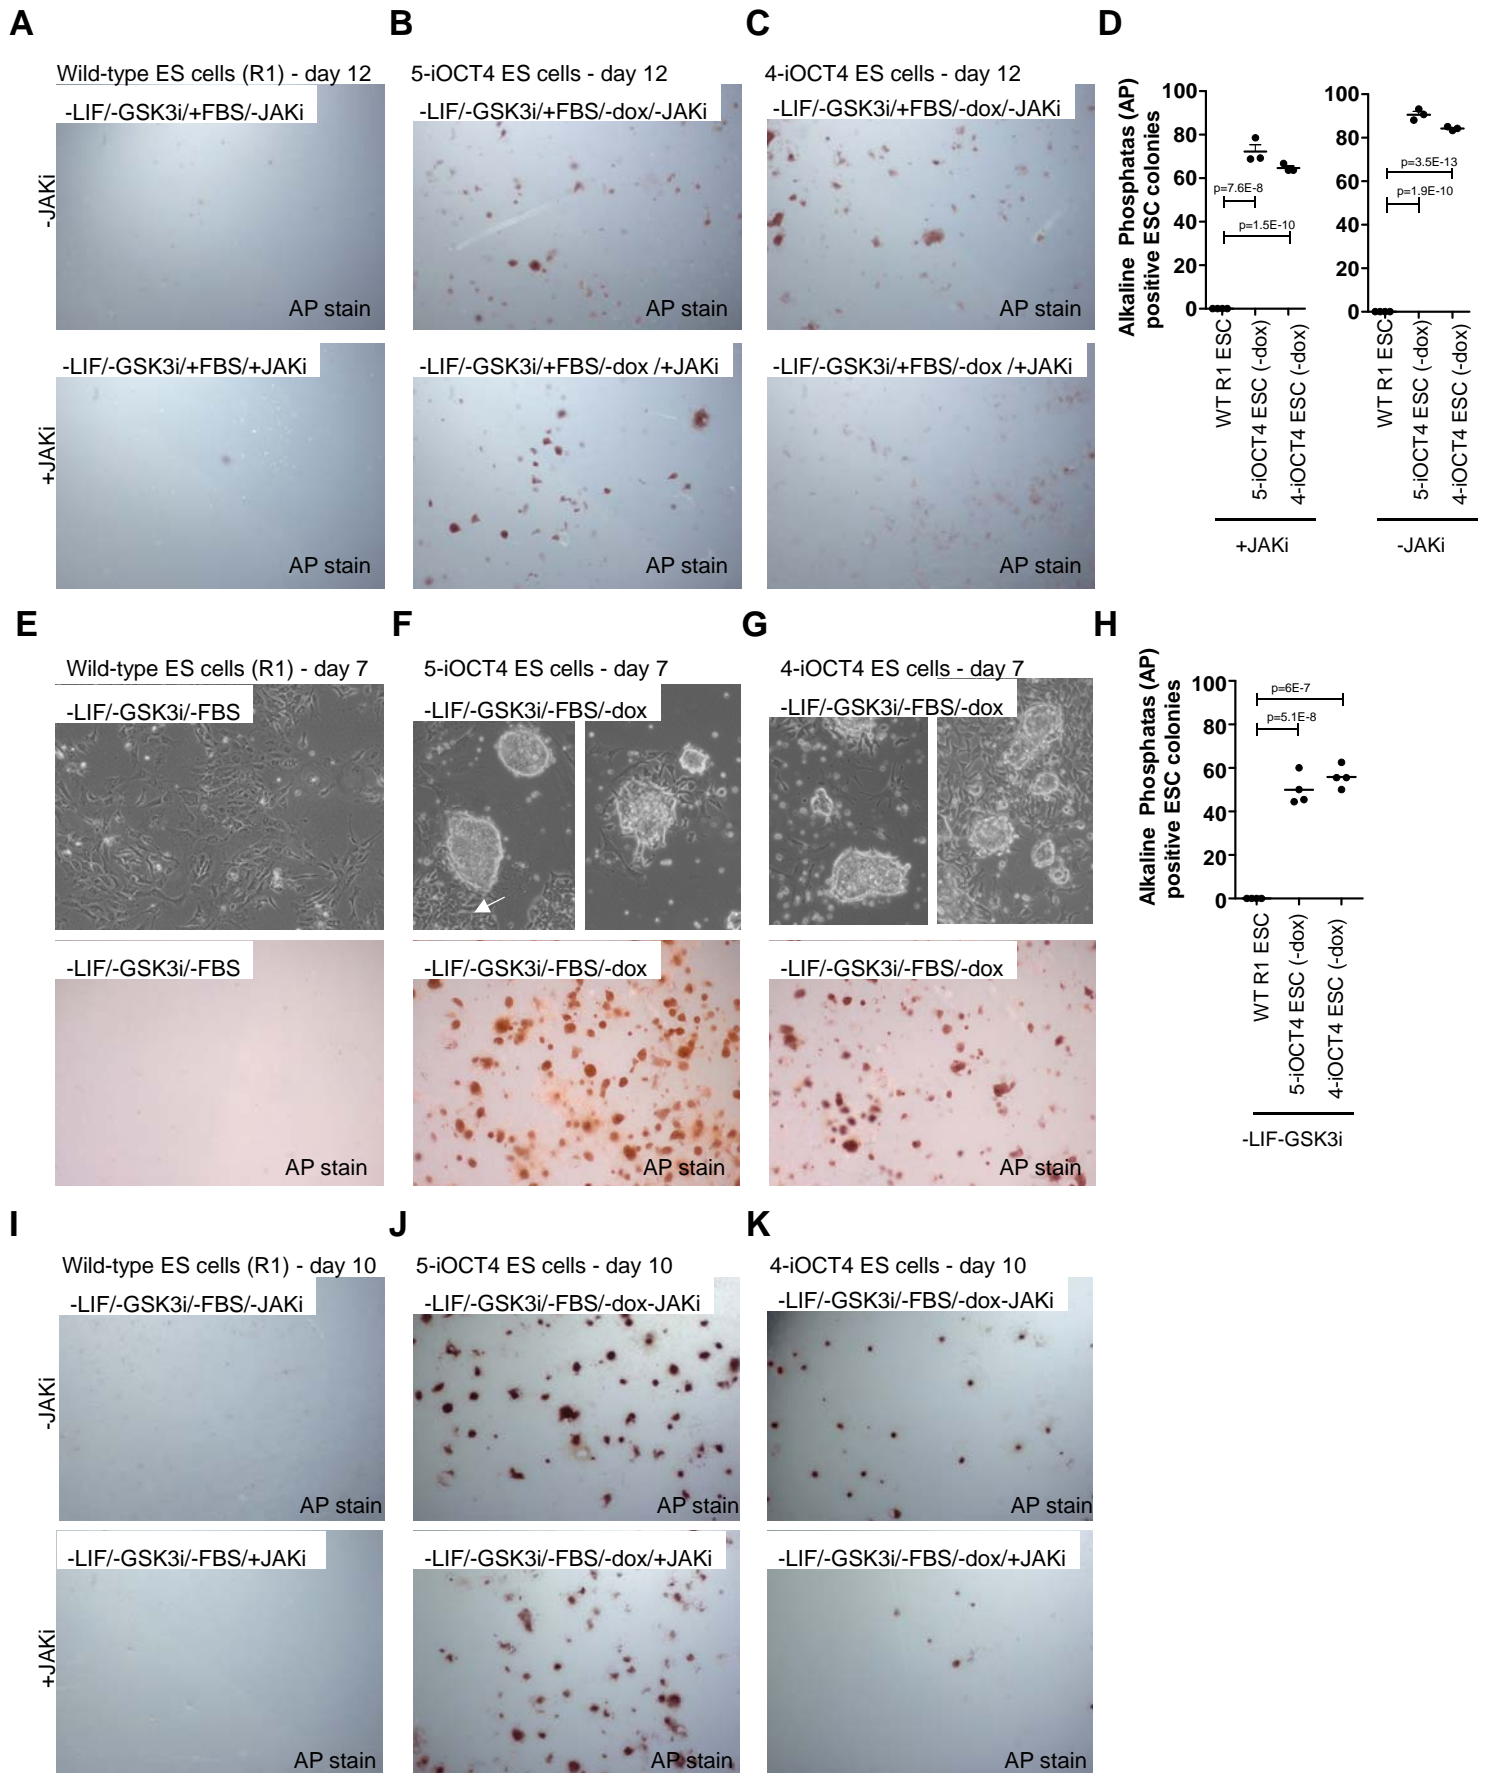

Supplemental Figure 1

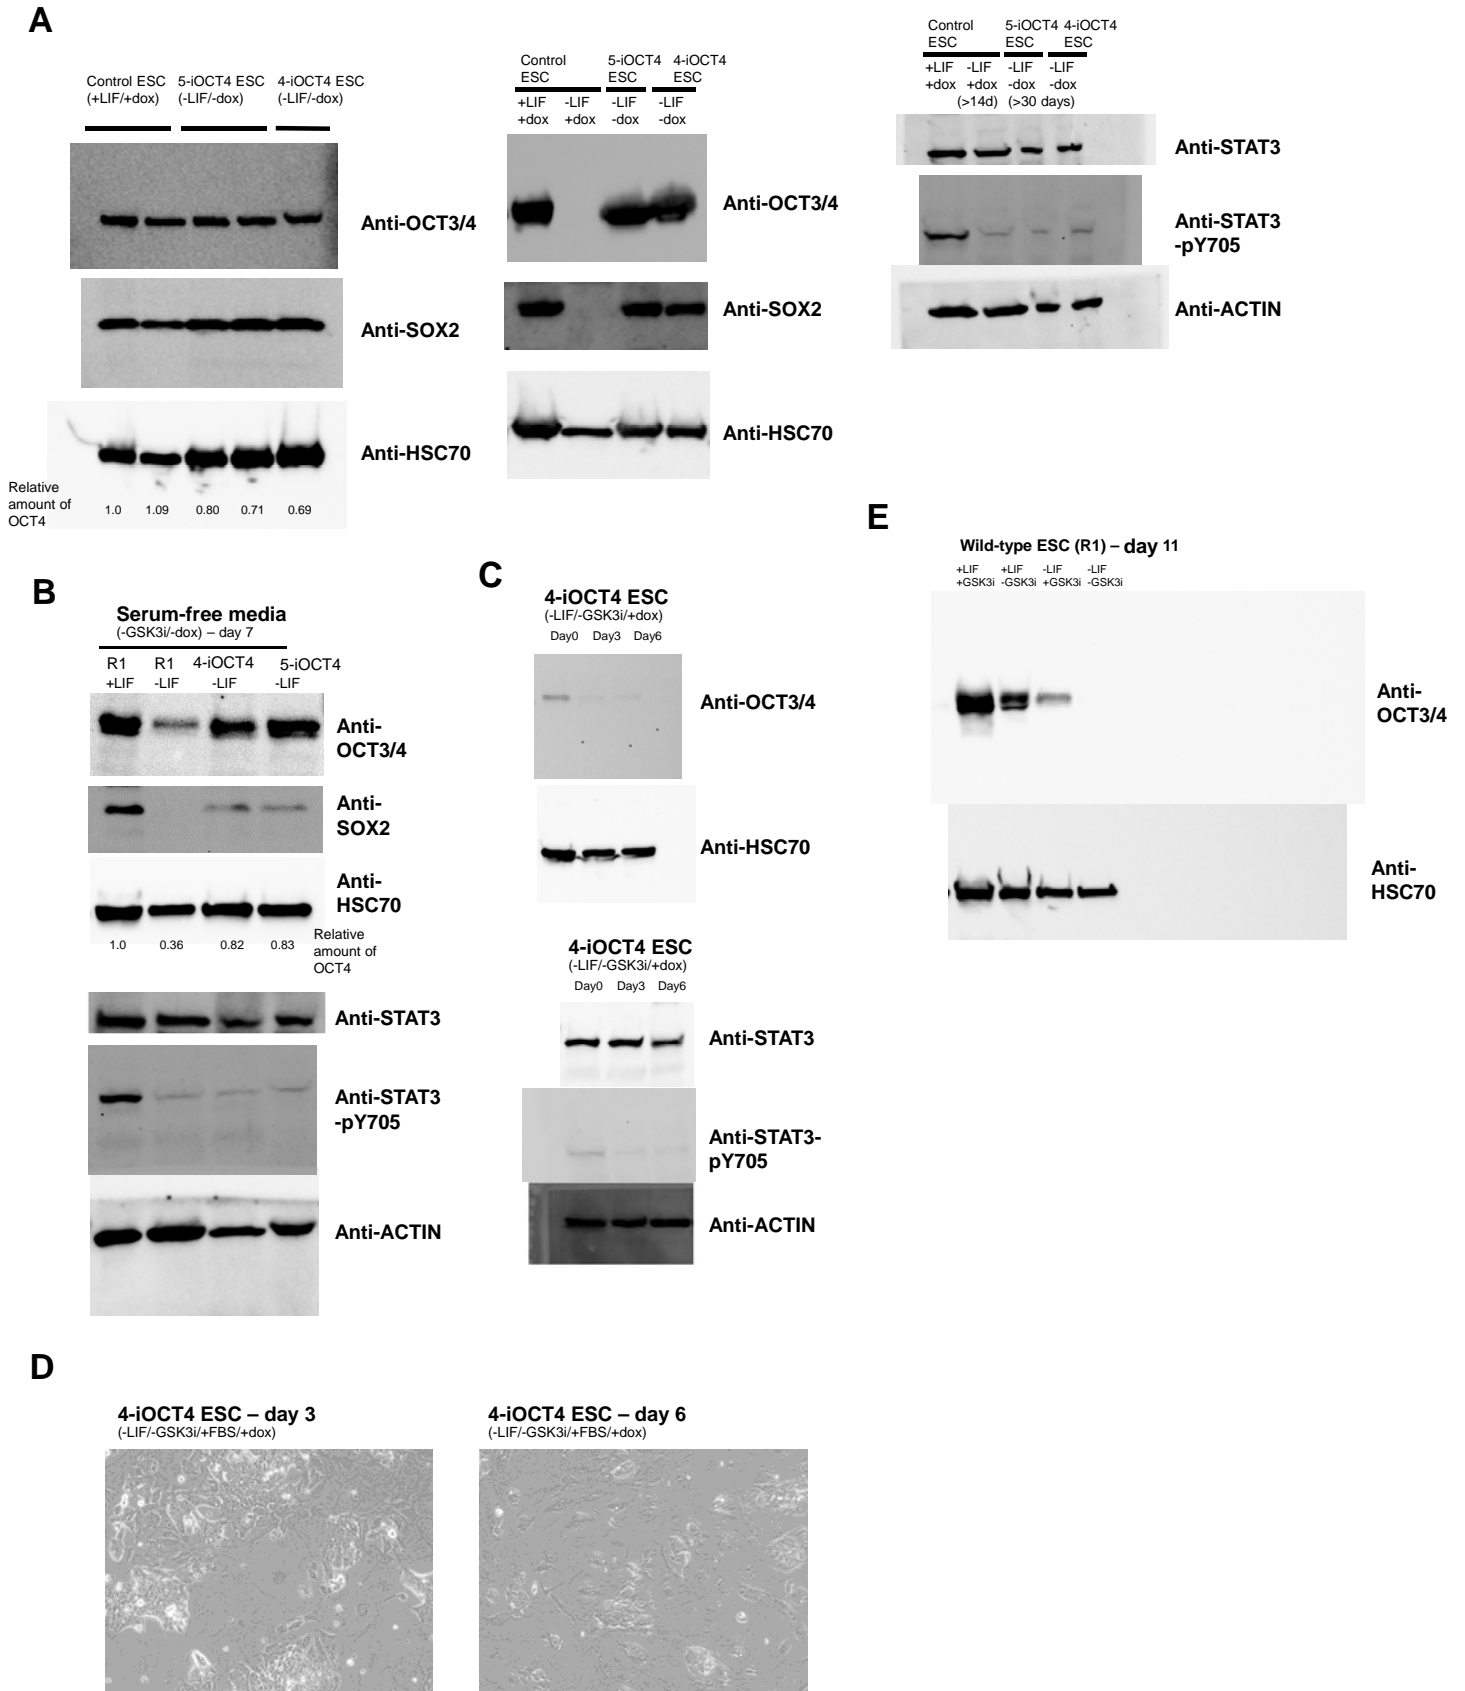

Supplement: 41598_2017_16611_MOESM3_ESM.pdf [file 41598_2017_16611_MOESM3_ESM.pdf]
